# Supplementary material for: Can Diversifying Selection Be Distinguished from History in Geographic Clines? A Population Genomic Study of Killifish (Fundulus heteroclitus)
Source: PubMed Central journal article supplement (PMC3458873; doi:10.1371/journal.pone.0045138), 2012-09-26

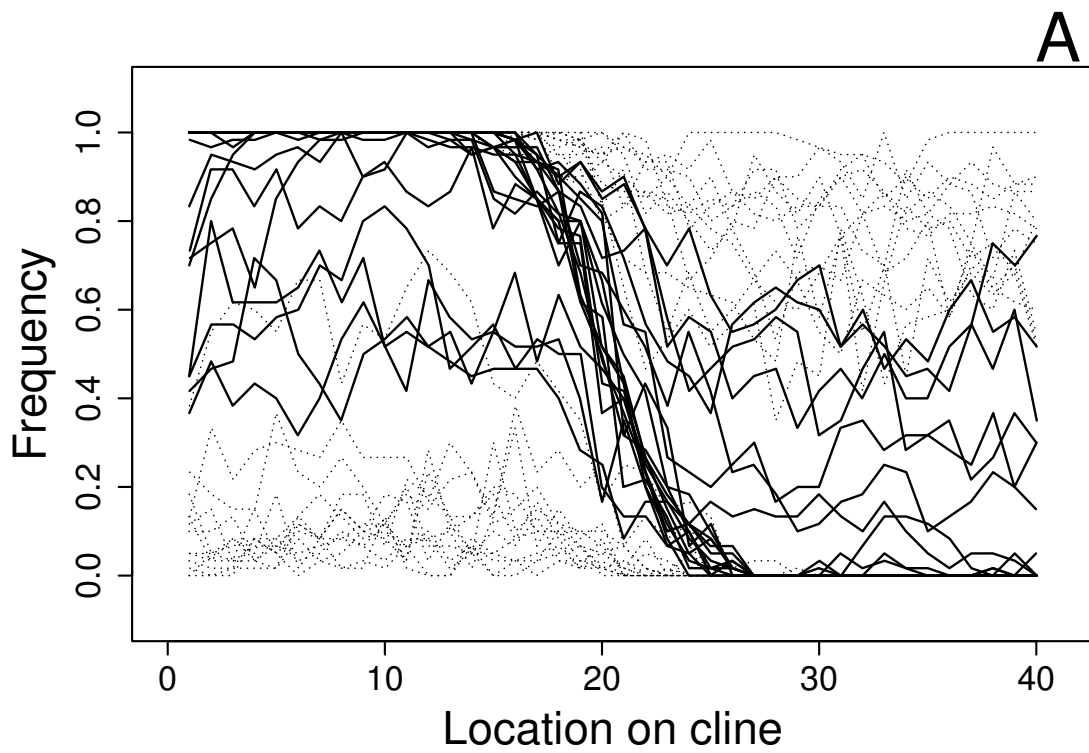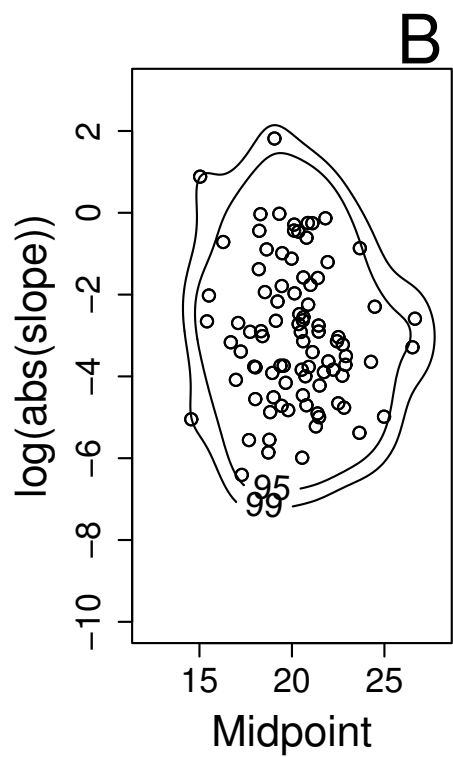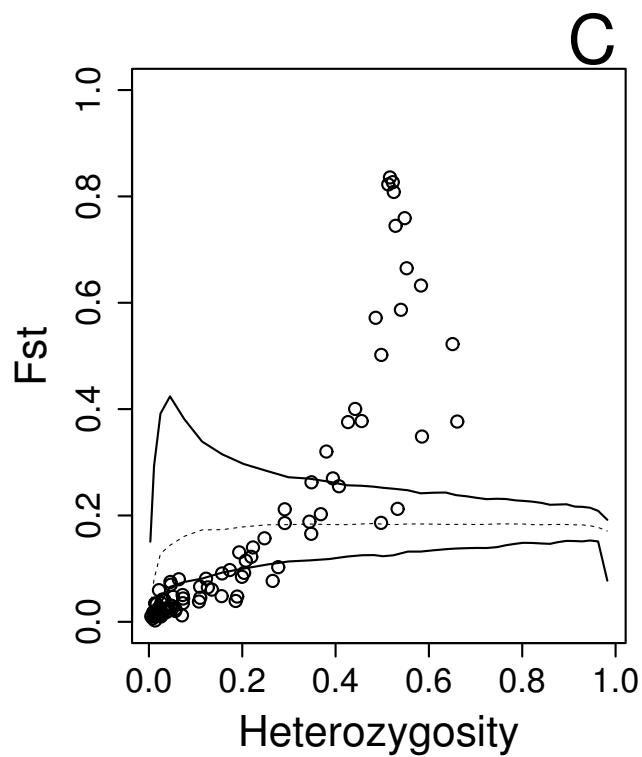

Supplement: pone.0045138.s002.pdf [file pone.0045138.s002.pdf]
