# Supplementary material for: Can Diversifying Selection Be Distinguished from History in Geographic Clines? A Population Genomic Study of Killifish (Fundulus heteroclitus)
Source: PubMed Central journal article supplement (PMC3458873; doi:10.1371/journal.pone.0045138), 2012-09-26
Supplement: pone.0045138.s003.pdf [file pone.0045138.s003.pdf]

Table S 1: Loci identified as outliers using Co-Co and `fdist2` analyses

| Locus                          | Type     | CoCo | fdist2 |
|--------------------------------|----------|------|--------|
| x280_83                        | SNP      |      | X      |
| x65_135                        | SNP      |      | X      |
| xCONTIG_538_2_COX1_SQUAC_CYTO_ | SNP      |      | X      |
| xTC15227_467                   | SNP      |      | X      |
| xTC15297_568                   | SNP      |      | X      |
| xTC15306_666                   | SNP      |      | X      |
| xTC15344_885                   | SNP      |      | X      |
| xTC15361_229                   | SNP      |      | X      |
| xTC15412_571                   | SNP      |      | X      |
| xTC15413_237                   | SNP      |      | X      |
| xTC15431_171                   | SNP      |      | X      |
| xTC15477_258                   | SNP      |      | X      |
| xTC15759_647                   | SNP      |      | X      |
| xTC15866_633                   | SNP      |      | X      |
| xTC15936_105                   | SNP      |      | X      |
| xTC16027_529                   | SNP      |      | X      |
| xTC16344_233                   | SNP      |      | X      |
| xTC16441_544                   | SNP      |      | X      |
| xTC17468_80                    | SNP      |      | X      |
| xTC17785_524                   | SNP      |      | X      |
| xTC18194_242                   | SNP      |      | X      |
| xTC18652_242                   | SNP      |      | X      |
| xTC18885_458                   | SNP      |      | X      |
| xTC19007_297                   | SNP      |      | X      |
| xTC22196_102                   | SNP      |      | X      |
| mtdna                          | mtDNA    | X    | X      |
| mdh                            | Allozyme | X    | X      |
| xCONTIG_966_MDMC_STRMY.1       | SNP      | X    |        |
| x1328_135.1                    | SNP      | X    |        |
| xTC17598_212.1                 | SNP      | X    |        |
